# Supplementary material
Source: publisher site journal article supplement (http://www.degruyter.com/publication/journal_key/HTMP/downloadAsset/HTMP_SI%20HTMP_CFP_thermal_heat.pdf)
Supplement: Supplementary file 1 [file HTMP_SI%20HTMP_CFP_thermal_heat.pdf]

# Topical Issue in High Temperature Materials and Processes: Thermal Management and Heat Transfer in Materials for Building Applications

## GUEST EDITOR

**Paulo F. A. Santos**

Associate Professor

Department of Civil Engineering

University of Coimbra, Portugal

[pfsantos@dec.uc.pt](mailto:pfsantos@dec.uc.pt)

## DESCRIPTION

We are thrilled to devote a new Topical Issue of High Temperature Materials and Processes about material thermal management and heat transfer for building applications. With the advancement of science and technology, the material thermal study has important theoretical significance and practical application value in high-temperature materials design, composite materials process, energy production and storage, etc. The Topical Issue aims to present the advances in thermal management and heat transfer of various materials for building applications.

## KEYWORDS

- Advanced energy materials
- Design of high-temperature materials
- Composite materials
- Phase change materials
- Heat and mass transfer
- Thermal management
- Thermal conductivity
- Computational fluid dynamics
- Building applications

## HOW TO SUBMIT

Deadline: 31st of July 2024

Before submission authors should carefully read the [Instruction for Authors](#). In order to make the preparation of manuscript easier, you are advised to use the [Manuscript Template](#).

All submissions to the Topical Issue must be made electronically via the Issue must be made electronically via the [Editorial Manager submission and tracking review system](#).

All manuscripts will undergo the standard peer-review process (single-blind, at least two independent reviewers). When entering your submission via online submission system please choose “Topical Issue: Thermal Management and Heat Transfer in Materials for Building Applications”.

The deadline for submissions is July 31st, 2024, but individual papers will be reviewed and published online on an ongoing basis.

In case of any question please contact Ms. Joanna Kosińska, Managing Editor of High Temperature Materials and Processes, [Joanna.Kosinska@degruyter.com](mailto:Joanna.Kosinska@degruyter.com).
